# Supplementary material
Source: PubMed Central journal article supplement (PMC3678282)

**Figure S1**

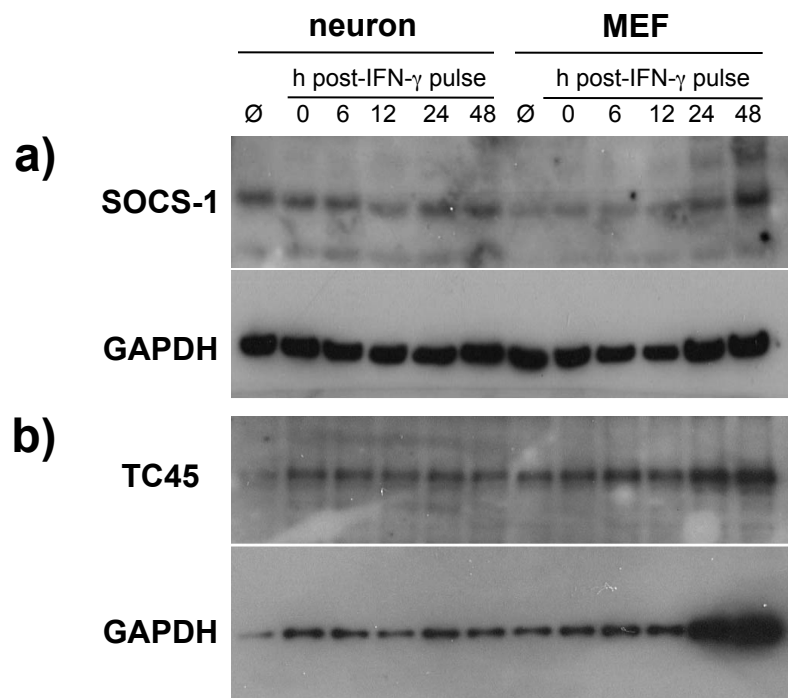

Supplement: NIHMS388167-supplement-01.pdf [file NIHMS388167-supplement-01.pdf]
